## ACKNOWLEDGMENT

The Editor-in-Chief and the Editors of ANESTHESIOLOGY wish to thank the following consultants and referees for making available their expert knowledge in reviews of manuscripts.

STEPHEN E. ABRAM, M.D.  
 HASSAN H. ALI, M.D.  
 J. JEFFREY ANDREWS, M.D.  
 WILLIAM P. ARNOLD III, M.D.  
 G. RICHARD ARTHUR, PH.D.  
 ALAN A. ARTRU, M.D.  
 JOHN L. ATLEE III, M.D.  
 MICHAEL J. AVRAM, PH.D.  
 HELEN A. BAGHDOYAN, PH.D.  
 ROGER J. BAGSHAW, M.D.  
 PETER L. BAILEY, M.D.  
 CEDRIC R. BAINTON, M.D.  
 PAUL G. BARASH, M.D.  
 STEVEN J. BARKER, M.D.  
 GERARD BASHEIN, M.D., PH.D.  
 CHARLES BEATTIE, M.D.  
 DR. D. E. BEBOUT  
 KENNETH C. BECK, PH.D.  
 ROBERT F. BEDFORD, M.D.  
 CHARLOTTE BELL, M.D.  
 HENRY BENNETT, PH.D.  
 JONATHAN L. BENUMOF, M.D.  
 CHARLES B. BERDE, M.D.  
 MICHAEL R. BERMAN, PH.D.  
 CHRISTOPHER M. BERNARDS,  
 M.D.  
 FREDERIC A. BERRY, JR., M.D.  
 FROUKJE M. BEYNEN, M.D.  
 THOMAS J. BLANCK, M.D.  
 GEORGE W. BLANKENSHIP, JR.,  
 M.D.  
 R. I. BLOCK, PH.D.  
 ZELJKO J. BOSNJAK, PH.D.  
 PHILLIP O. BRIDENBAUGH, M.D.  
 JOHN G. BROCK-UTNE, M.B.  
 JAY B. BRODSKY, M.D.  
 PHILIP R. BROMAGE, M.B.  
 B. BROMBERGER, PH.D.  
 BURNELL R. BROWN, JR., M.D.,  
 PH.D.  
 ROBERT BROWN, M.D.  
 JOHN F. BUTTERWORTH IV, M.D.  
 MICHAEL K. CAHALAN, M.D.  
 RODERICK K. CALVERLEY, M.D.  
 ROBERT A. CAPLAN, M.D.  
 RANDALL L. CARPENTER, M.D.  
 ANGELINA CARVALHO, M.D.  
 JACQUES E. CHELLEY, M.D., PH.D.  
 PENG CHEN, M.D.  
 FREDERICK W. CHENEY, JR., M.D.  
 CYNTHIA B. COHEN, J.D.  
 MARSHA M. COHEN, M.D.,  
 F.R.C.P.C.  
 NEAL H. COHEN, M.D.  
 SHEILA E. COHEN, M.B.  
 J. G. COLLINS, PH.D.  
 THOMAS J. CONAHAN III, M.D.  
 D. RYAN COOK, M.D.  
 CHARLES J. COTÉ, M.D.  
 ROBERT K. CRONE, M.D.  
 GREGORY CROSBY, M.D.  
 DAVID J. CULLEN, M.D.  
 CRAIG CURRY, M.D.  
 DAVID R. DANTZKER, M.D.  
 COSMO A. DI FAZIO, M.D.  
 FRANCOIS DONATI, PH.D., M.D.  
 JOHN C. DRUMMOND, M.D.  
 RONALD DUECK, M.D.  
 PETER CHARLES DUKE, M.D.  
 EDMOND I. EGER II, M.D.  
 JOHN H. EICHHORN, M.D.  
 JOHN E. ELLIS, M.D.  
 NORIG ELLISON, M.D.  
 ALEX S. EVERS, M.D.  
 H. BARRIE FAIRLEY, M.B.  
 LEONARD L. FIRESTONE, M.D.  
 NICK FLAVAHAN, PH.D.  
 ROBERT FORBES, M.D.  
 PAUL J. FRIEDMAN, M.D.  
 ALISON B. FROESE, M.D.  
 STEVE FULLER, PH.D.  
 DAVID M. GABA, M.D.  
 THOMAS J. GAL, M.D.  
 JOHN D. GALLAGHER, M.D.  
 A. JAY GANDOLFI, PH.D.  
 GERALD F. GEBHART, PH.D.  
 ADRIAN W. GELB, M.D.  
 MOHAMED M. GHONEIM, M.D.  
 CHARLES P. GIBBS, M.D.  
 D. DAVID GLASS, M.D.  
 MICHAEL L. GOOD, M.D.  
 ALLAN GOTTSCHALK, M.D.  
 PETER GRAFE, M.D.  
 JOACHIM S. GRAVENSTEIN, M.D.  
 GLENN P. GRAVLEE, M.D.  
 WILLIAM J. GRELEY, M.D.  
 DR. RONALD GREGG  
 JEFFREY B. GROSS, M.D.  
 WILLIAM K. HAMILTON, M.D.  
 ALAIN HARF, M.D.  
 DR. STEVEN C. HEMPLEMAN  
 THOMAS K. HENTHORN, M.D.  
 PAUL R. HICKEY, M.D.  
 BRADLEY J. HINDMAN, M.D.  
 WILLIAM E. HOFFMAN, PH.D.  
 PHILIPPE HOUSMANS, M.D., PH.D.  
 ROLF D. HUBMAYR, M.D.  
 ROBERT J. HUDSON, M.D.  
 CARL C. HUG, JR., M.D., PH.D.  
 WILLIAM E. HURFORD, M.D.  
 PAUL A. IAIZZO, PH.D.  
 JAMES JACOBS, PH.D.  
 LOUIS JACOBSON, M.D.  
 DAVID B. JACOBY, M.D.  
 STUART W. JAMIESON, M.D.  
 ROGER JEANLOZ, PH.D.  
 ROBERT A. JOHNS, M.D.  
 ROBERT KACMAREK, PH.D.  
 YOOGOO KANG, M.D.  
 IRA S. KASS, PH.D.  
 JORDAN KATZ, M.D.  
 ARTHUR S. KEATS, M.D.  
 JOHN C. KEIFER, M.D.  
 JOAN J. KENDIG, PH.D.  
 CHARLES R. KERR, M.D.  
 WILLIAM R. KIMBALL, M.D.  
 IGOR KISSIN, M.D., PH.D.  
 RICHARD L. KNILL, M.D.  
 W. ANDREW KOFKE, M.D.  
 AARON F. KOPMAN, M.D.  
 E. GREG KOSKI, PH.D., M.D.  
 ELLIOT J. KRANE, M.D.  
 KENNETH R. LAMANTIA, M.D.  
 DONALD LAMBERT, PH.D., M.D.  
 DAVID LANGE, M.D., PH.D.  
 WILLIAM L. LANIER, JR., M.D.  
 KATHRYN F. LANOUE, PH.D.  
 DEMETRIOS G. LAPPAS, M.D.  
 DAVID R. LARACH, M.D., PH.D.  
 MARILYN G. LARACH, M.D.  
 C. PHILIP LARSON, JR., M.D.  
 BARBARA L. LEIGHTON, M.D.  
 JERROLD LERMAN, M.D.  
 JACQUELINE LEUNG, M.D.  
 JERROLD H. LEVY, M.D.  
 STUART LIND, M.D.  
 KAREN S. LINDEMAN, M.D.  
 MARK LIU, M.D.  
 MARTIN J. LONDON, M.D.  
 DAVID E. LONGNECKER, M.D.  
 EDWARD LOWENSTEIN, M.D.  
 RALPH LYDIC, PH.D.  
 ROBERT C. MACKERSIE, M.D.  
 SUSAN MARGULIES, PH.D.  
 KEITH H. MARKS, M.B.  
 BRYAN E. MARSHALL, M.D.  
 DONALD E. MARTIN, M.D.  
 RICHARD I. MAZZE, M.D.  
 ROBERT W. MCPHERSON, M.D.  
 ROBERT G. MERIN, M.D.  
 JOHN D. MICHENFELDER, M.D.  
 WALTER L. MILLAR, M.D.  
 EDWARD D. MILLER, JR., M.D.  
 KEITH W. MILLER, PH.D.  
 RONALD D. MILLER, M.D.  
 RICHARD E. MOON, M.D.  
 DENIS R. MOREL, M.D.  
 JAMES L. MOSTROM, M.D.  
 TERENCE M. MURPHY, M.B.  
 CONSTANCE F. NELLY, M.D.  
 THOMAS E. NELSON, PH.D.  
 MARK C. NORRIS, M.D.  
 NANCY A. NUSSMEIER, M.D.  
 FREDRICK K. ORKIN, M.D.  
 EUGENE ORNSTEIN, PH.D., M.D.  
 ANDRANIK OVASSAPIAN, M.D.  
 ANNETTE G. PASHAYAN, M.D.  
 EDWARD G. PAVLIN, M.D.  
 RONALD G. PEARL, PH.D., M.D.  
 DANIEL M. PHILBIN, M.D.

MARIE C. PRAGER, M.D.  
DONALD S. PROUGH, M.D.  
JACK K. PRUETT, PH.D.  
NEIL R. PUMFORD, PH.D.  
SRINIVASA N. RAJA, M.D.  
D. EUGENE RANNELS, PH.D.  
DR. SAMUEL I. RAPAPORT  
RICHARD L. RAUCK, M.D.  
L. BRIAN READY, M.D.  
KAI REHDER, M.D.  
LAURENCE S. REISNER, M.D.  
J. GERALD REVES, M.D.  
PETER ROCK, M.D.  
MARK A. ROCKOFF, M.D.  
MARK C. ROGERS, M.D.  
MICHAEL F. ROIZEN, M.D.  
MARK A. ROSEN, M.D.  
MYER H. ROSENTHAL, M.D.  
CARL ROSOW, MD.  
PETER T. ROTHSTEIN, M.D.  
JOHN C. ROWLINGSON, M.D.  
ROGER LEE ROYSTER, M.D.  
JOAN RUFFLE, M.D.  
GEORGE W. RUNG, M.D.  
STEPHEN M. RUPP, M.D.  
BEN F. RUSY, M.D.  
DAVID J. SAHN, M.D.  
MARK S. SCHELLER, M.D.

WILLIAM T. SCHMELING, M.E.,  
PH.D.  
ARTHUR J. L. SCHNEIDER, M.D.  
ARMIN SCHUBERT, M.D.  
PAUL T. SCHUMACKER, M.D.  
PETER S. SEBEL, M.B.  
DANIEL I. SESSLER, M.D.  
JOHN W. SEVERINGHAUS, M.D.  
AUDREY C. SHAFER, M.D.  
STEVEN L. SHAFER, M.D.  
FREDERICK E. SIEBER, M.D.  
GARY C. SIECK, PH.D.  
RAYMOND S. SINATRA, M.D.  
THOMAS M. SKEEHAN, M.D.  
PETER D. SLINGER, M.D.  
DAVID S. SMITH, M.D.  
ROBERT M. SPEAR, M.D.  
LARRY R. SQUIRE, PH.D.  
THEODORE H. STANLEY, M.D.  
EUGENE P. STEFFEY, V.M.D.,  
PH.D.  
JOHN K. STENE, JR., M.D., PH.D.  
DAVID J. STEWARD, M.B.  
ROBERT K. STOELTING, M.D.  
JUDY Y. SU, PH.D.  
DAVID B. SWEDLOW, M.D.  
PAUL G. SZAUTER, PH.D.  
GALE E. THOMPSON, M.D.

DANIEL M. THYS, M.D.  
JOHN H. TINKER, M.D.  
ALAN S. TONNESEN, M.D.  
MIKE TRUSH, PH.D.  
LEROY VANDAM, M.D.  
RUSSELL A. VAN DYKE, PH.D.  
H. RONALD VINIK, M.D.  
CLARENCE F. WARD, M.D.  
DAVID M. WARD, M.D.  
DAVID C. WARLTIER, M.D., PH.D.  
DAVID O. WARNER, M.D.  
DAVID S. WARNER, M.D.  
PETER WATERMAN, M.D.  
MATTHEW B. WEINGER, M.D.  
RICHARD B. WEISKOPF, M.D.  
DWAYNE R. WESTENSKOW, PH.D.  
RANDALL C. WETZEL, M.D.  
DAVID M. WHEELER, M.D., PH.D.  
PAUL F. WHITE, PH.D., M.D.  
GERALD L. WOLF, M.D.  
ALASTAIR J. J. WOOD, M.D.  
MARGARET WOOD, M.B.  
HAROLD C. YANG, M.D.  
MYRON YASTER, M.D.  
MARIE YOUNG, M.D.  
JAMES R. ZAIDAN, M.D.  
GARY ZALOGA, M.D.  
MARK ZORNOW, M.D.
